# Supplementary material for: Broadly neutralizing antibodies target a haemagglutinin anchor epitope
Source: PubMed Central journal article supplement (PMC8828479; doi:10.1038/s41586-021-04356-8), 2021-12-23
Supplement: 41586_2021_4356_MOESM2_ESM.pdf [file 41586_2021_4356_MOESM2_ESM.pdf]

## Reporting Summary

Nature Portfolio wishes to improve the reproducibility of the work that we publish. This form provides structure for consistency and transparency in reporting. For further information on Nature Portfolio policies, see our [Editorial Policies](#) and the [Editorial Policy Checklist](#).

### Statistics

For all statistical analyses, confirm that the following items are present in the figure legend, table legend, main text, or Methods section.

n/a Confirmed

- The exact sample size ( $n$ ) for each experimental group/condition, given as a discrete number and unit of measurement
- A statement on whether measurements were taken from distinct samples or whether the same sample was measured repeatedly
- The statistical test(s) used AND whether they are one- or two-sided  
*Only common tests should be described solely by name; describe more complex techniques in the Methods section.*
- A description of all covariates tested
- A description of any assumptions or corrections, such as tests of normality and adjustment for multiple comparisons
- A full description of the statistical parameters including central tendency (e.g. means) or other basic estimates (e.g. regression coefficient) AND variation (e.g. standard deviation) or associated estimates of uncertainty (e.g. confidence intervals)
- For null hypothesis testing, the test statistic (e.g.  $F$ ,  $t$ ,  $r$ ) with confidence intervals, effect sizes, degrees of freedom and  $P$  value noted  
*Give  $P$  values as exact values whenever suitable.*
- For Bayesian analysis, information on the choice of priors and Markov chain Monte Carlo settings
- For hierarchical and complex designs, identification of the appropriate level for tests and full reporting of outcomes
- Estimates of effect sizes (e.g. Cohen's  $d$ , Pearson's  $r$ ), indicating how they were calculated

*Our web collection on [statistics for biologists](#) contains articles on many of the points above.*

### Software and code

Policy information about [availability of computer code](#)

Data collection Software - Leginon beta and v3.2, Appion beta

Data analysis Code - dms\_tools2 version 2.4.12, dms\_tools version 1.1.12  
Software - Prism 8, Prism 9, VGene (beta), Librator (beta), Cellrander Single-Cell Software suite v3.0, Seurat 3 v3.2.0, LinQ-View v0.99, WebLogo v2.8.2, UCSF Chimera 1.14, Pymol v2.3.4, Rosettaantibody v2021, MOE v2020, AMBER v20, GROMACS 2019.2 with plumed-2.5.2., PyEMMA v2.5.7, FlowJo v10, MotionCor v2, Relion v3.0, XQuartz v2.7.11, abYsis v3.4.1, Rosetta 2020.03.61102, coot 0.9-pre EL, CryoSPARC2 3.2.0, Phenix 1.17.1-3660, Clustal Omega (<https://www.ebi.ac.uk/Tools/msa/clustalo/>).

For manuscripts utilizing custom algorithms or software that are central to the research but not yet described in published literature, software must be made available to editors and reviewers. We strongly encourage code deposition in a community repository (e.g. GitHub). See the Nature Portfolio [guidelines for submitting code & software](#) for further information.

### Data

Policy information about [availability of data](#)

All manuscripts must include a [data availability statement](#). This statement should provide the following information, where applicable:

- Accession codes, unique identifiers, or web links for publicly available datasets
- A description of any restrictions on data availability
- For clinical datasets or third party data, please ensure that the statement adheres to our [policy](#)

Repertoire data generated from single cell RNA-sequencing data is deposited at Mendeley Data (<https://data.mendeley.com/datasets/jzsx489pkm/1>). Accession numbers for all other anchor-targeting mAbs are included in Supplemental Table 1. Electron microscopy maps were deposited to the Electron Microscopy DataBank under accession IDs: D\_100025433, D\_1000254374, D\_1000254375, D\_1000254376, D\_1000254377, D\_1000254378, D\_1000254383, D\_1000254384,

D\_1000254385, D\_1000254386, D\_1000254388, D\_1000254379, D\_1000254391, and D\_1000254382. All next generation sequencing data for 045-09 2B06 deep mutational scanning and for the H1N1 mutational scanning can be found on the Sequence Read Archive under BioProject accession number PRJNA309339. The following Protein Database accession numbers were downloaded and included in the manuscript - 6HJQ, 3SDY, 4NM8, 6HJQ, 4M4Y, 4WE4, 4JTV, 4FQI, 3ZTN, and 7MEM.

## Field-specific reporting

Please select the one below that is the best fit for your research. If you are not sure, read the appropriate sections before making your selection.

Life sciences  Behavioural & social sciences  Ecological, evolutionary & environmental sciences

For a reference copy of the document with all sections, see [nature.com/documents/nr-reporting-summary-flat.pdf](https://www.nature.com/documents/nr-reporting-summary-flat.pdf)

## Life sciences study design

All studies must disclose on these points even when the disclosure is negative.

|                 |                                                                                                                                           |
|-----------------|-------------------------------------------------------------------------------------------------------------------------------------------|
| Sample size     | Samples sizes were based on the number of donors and ability to process samples.                                                          |
| Data exclusions | No data were excluded.                                                                                                                    |
| Replication     | All experiments were performed more than once, except the mouse viral titers. All replications were successful.                           |
| Randomization   | Recipients for the cHA vaccine arms were randomized. Otherwise, no other experimental groups were used and therefore were not randomized. |
| Blinding        | Serum competition ELISAs in Fig. 4 and Extended Data 6 were blinded. Otherwise, no other blinding was performed.                          |

## Reporting for specific materials, systems and methods

We require information from authors about some types of materials, experimental systems and methods used in many studies. Here, indicate whether each material, system or method listed is relevant to your study. If you are not sure if a list item applies to your research, read the appropriate section before selecting a response.

### Materials & experimental systems

| n/a                                 | Involved in the study                                           |
|-------------------------------------|-----------------------------------------------------------------|
| <input type="checkbox"/>            | <input checked="" type="checkbox"/> Antibodies                  |
| <input type="checkbox"/>            | <input checked="" type="checkbox"/> Eukaryotic cell lines       |
| <input checked="" type="checkbox"/> | <input type="checkbox"/> Palaeontology and archaeology          |
| <input type="checkbox"/>            | <input checked="" type="checkbox"/> Animals and other organisms |
| <input type="checkbox"/>            | <input checked="" type="checkbox"/> Human research participants |
| <input type="checkbox"/>            | <input checked="" type="checkbox"/> Clinical data               |
| <input checked="" type="checkbox"/> | <input type="checkbox"/> Dual use research of concern           |

### Methods

| n/a                                 | Involved in the study                              |
|-------------------------------------|----------------------------------------------------|
| <input checked="" type="checkbox"/> | <input type="checkbox"/> ChIP-seq                  |
| <input type="checkbox"/>            | <input checked="" type="checkbox"/> Flow cytometry |
| <input checked="" type="checkbox"/> | <input type="checkbox"/> MRI-based neuroimaging    |

## Antibodies

### Antibodies used

Anti-human IgG Fc - BV421, clone M1310G05, Biolegend, Cat#410703  
 Mouse anti-influenza A nucleoprotein antibody, clone A3, biotin, Sigma/Millipore, MAB8258B-5  
 Polyclonal Goat Anti-human IgG HRP, Jackson Immunoresearch, Cat#109-035-098  
 Polyclonal Goat anti-mouse IgG HRP, Southern Biotech, Cat# 1030-05  
 Polyclonal Goat anti-mouse IgG H&L peroxidase-conjugated, Rockland Cat#610-1302

Monoclonal antibodies from previous publications and synthesized in-house are listed below with reference -  
 CR9114 - 10.1126/science.1222908  
 3H9 - 10.1073/pnas.84.24.9150

Monoclonal antibodies unique to this study and synthesized in-house are listed below -  
 030-09 3E05  
 030-09M 1B06  
 045-09 1A03  
 045-09 2B03  
 047-09 4F04  
 SFV009 3D04  
 SFV009 3G01  
 SFV009 3G03  
 236 IgG 1A02

236 IgG 1D01  
236 IgG 1F01  
236 IgA 1F06  
241 IgG 2A06  
241 IgA 1D05  
241 IgA 2F04  
241 IgA 2F06  
121 2C06  
222 1C06  
301\_91  
301\_249  
301\_275  
308\_60  
310\_10  
310\_49  
317\_30  
317\_117  
319\_75  
319\_147  
319\_345  
319\_373  
322\_48  
324\_5  
326\_38  
326\_42  
326\_50  
327\_32  
334\_52  
334\_53  
334\_62  
337\_32  
337\_43  
337\_95  
346\_54  
347\_64  
347\_246  
350\_8  
350\_22  
350\_132  
350\_145  
351\_38  
351\_93  
351\_139  
029-09 4A01  
047-09 1F05  
047-09 4E01  
051-094B02  
051-09 4C06  
051-09 4E06  
051-09 5A02  
051-09 5C01  
030-09 1A06  
030-09 1E04  
030-09 2B03  
030-09 2G03  
030-09 3B03  
045-09 2B06  
SFV005 2G02  
SFV019 4E03  
SFV009 2A06  
SFV009 3A01  
sc1009 3B05  
sc1009 3E06  
SF1000 3D04  
sc70 1F02  
sc70 5B03  
039-10 5F06  
039-10 5G02  
039-10 5G05  
240 IgG 1C04  
220 IgG 1A05  
237 IgG 1D01  
241 IgA 1D05  
241 IgA 2E06  
301-48  
301-90

301-277  
308-2  
311-30  
319-4  
319-73  
319-99  
319-256  
319-418  
324-184  
334-98  
337-51  
337-53  
347-58  
347-140  
351-31

## Validation

All commercial antibodies were validated by their manufacturers and were titrated in the lab to determine optimal concentration for experimentation. In-house generated monoclonal antibodies were validated in preliminary ELISAs to A/California/7/2009 H1N1 virus or recombinant H1 or cH5/1 proteins. MAb concentrations were standardized based on the assay and starting concentration is described in methods section.

## Eukaryotic cell lines

Policy information about [cell lines](#)

## Cell line source(s)

HEK293T cells - ATCC  
MDCK cells - ATCC  
A549 cells - ATCC  
Jurkat cells expressing FcgRIIIa with NFAT-drive luciferase reporter gene - Promega, G7010  
MDCK-SIAT1 - generated in 10.1126/science.1187816.

## Authentication

Cell lines were authenticated by supplier. No other authentication at the lab level was performed.

## Mycoplasma contamination

Cell lines were not tested.

Commonly misidentified lines  
(See [ICLAC](#) register)

No commonly misidentified cell lines were used in this study.

## Animals and other organisms

Policy information about [studies involving animals](#); [ARRIVE guidelines](#) recommended for reporting animal research

## Laboratory animals

6-8 week old female Balb/c mice were used for challenge studies. Mice were housed in ABSL-2 conditions with 12-hour light/dark cycles and controlled temperature and humidity.

## Wild animals

No wild animals were used in this study

## Field-collected samples

No field collected samples were used in this study.

## Ethics oversight

Animal experiments were approved by the University of Chicago and Icahn School of Medicine at Mount Sinai IACUCs.

Note that full information on the approval of the study protocol must also be provided in the manuscript.

## Human research participants

Policy information about [studies involving human research participants](#)

## Population characteristics

For the 2009 MIV, 2009 pH1N1 infection, 2010 TIV, and 2014 QIV cohorts, median age was 30 years old with a range of 20-64. 63% of donors were women. Only birth date, prior influenza virus vaccination status, and sex were obtained or released to the authors for donors within these cohorts.

For the cHA vaccine trial - In Groups 1, 2, and 4 about two-thirds of the subjects were female (70.0%, 66.7%, and 62.5%, respectively), compared to 2/5 (40.0%) in Group 3 and 5/10 (50.0%) in Group 5. Most were non-Hispanic or Latino (80% to 100% per group) and black or African American (66.7% to 87.5%). The median age at enrollment ranged from 26 to 31 years across groups, with minimum age ranging from 18 to 22 and maximum age from 29 to 38. The median weight ranged from 74.7 kg to 84.2 kg and the median height ranged from 165.5 cm to 174.0 cm.

The most common pre-existing conditions across all treatment groups were immune system disorders (24/66, 36.4%), the majority being allergies (seasonal and food), followed by drug hypersensitivity.

No subjects in the placebo Groups 3 and 5 reported taking prior medications and more subjects in Group 1 (5/19, 26.3%) reported taking prior medications compared to Group 2 (1/14, 7.1%) and Group 4 (2/15, 13.3%). The proportions of subjects taking concomitant medications in Groups 1 to 5 were 84.2%, 78.6%, 100%, 60.0% and 80.0%, respectively. The most common, by therapeutic subgroup, were analgesics (20/61, 32.8%), anti-inflammatory and anti rheumatic products (19/61, 31.1%) and sex hormones and modulators of the genital system (18/61, 29.5%).

## Recruitment

Participants were recruited from the local community for all cohorts. The target population reflected the community at large. All participants provided informed consent. Donors for the 2009 MIV, 2010 TIV, 2014 QIV, and 2009 pH1N1 infection had been recruited from prior studies from the local community. Participants for the cHA vaccine trial were recruited according to Bernstein et al. Lancet Infectious Disease 2020 and Nachbagauer et al. Nature Medicine 2020. The target population reflected the community at large at each of the participating study sites. Information regarding this trial was provided to potential subjects who have previously participated in vaccine trials conducted at the participating study sites.

## Ethics oversight

The study protocol was approved by the IRB at the University of Chicago for all studies, the Emory University for the 2009 pH1N1 infection and 2009 MIV cohorts, and at Icahn School of Medicine at Mount Sinai, Duke University and Cincinnati Children's Hospital Medical Center (CCHMC) for the cHA vaccine study.

Note that full information on the approval of the study protocol must also be provided in the manuscript.

## Clinical data

Policy information about [clinical studies](#)

All manuscripts should comply with the ICMJE [guidelines for publication of clinical research](#) and a completed [CONSORT checklist](#) must be included with all submissions.

## Clinical trial registration

NCT03300050

## Study protocol

Study Protocol can be accessed here - [https://clinicaltrials.gov/ProvidedDocs/50/NCT03300050/Prot\\_000.pdf](https://clinicaltrials.gov/ProvidedDocs/50/NCT03300050/Prot_000.pdf)

## Data collection

Gamble Program for Clinical Studies, Cincinnati Children's Hospital Medical Center 3333 Burnet Avenue, Cincinnati, OH 45229-3039  
 Duke Early Phase Clinical Research Unit, Duke Clinical Research Institute 40 Duke Medicine Circle, Durham, NC 27710  
 Studied period:  
 Date of first enrollment: 10 October 2017  
 Date of last subject completion: 09 August 2019

## Outcomes

## Primary Objectives

To assess the reactogenicity and safety through 28 days after each priming dose of cH8/1N1 LAIV (or placebo) and the booster dose of cH5/1N1 IIV +/- AS03A (or placebo) and through 28 days after each dose of IIV (cH8/1N1 IIV + AS03A and cH5/1N1 IIV + AS03A) (or placebo) in terms of rates of solicited local and general adverse events (AEs) through 7 days post-vaccination, unsolicited AEs through 28 days post vaccination, hematological and biochemical laboratory abnormalities up to Visit 13, and medically attended event (MAEs), laboratory-confirmed influenza-like illness (LC-ILI), potential immune-mediated disease (pIMDs), and serious adverse events (SAEs) through Visit 13.

## Secondary Objectives

For this study, serum antibody titers (EC50) for the anchor and central stalk epitopes was determined. Only individuals with samples at d1, 28, 85, 113, and 420 were included in the analysis. Seroconversion was considered when titers increased by 1.5x over pre-vaccine time points (d1 or d85).

## Flow Cytometry

### Plots

Confirm that:

- The axis labels state the marker and fluorochrome used (e.g. CD4-FITC).
- The axis scales are clearly visible. Include numbers along axes only for bottom left plot of group (a 'group' is an analysis of identical markers).
- All plots are contour plots with outliers or pseudocolor plots.
- A numerical value for number of cells or percentage (with statistics) is provided.

### Methodology

## Sample preparation

HEK293T cells were transfected with plasmids to express full length membrane-bound A/California/7/2009 H1 or membrane bound mini-HA. Cells were harvested 4 days later and stained with monoclonal antibodies of interest, which were detected with an anti-human IgG-BV421.

## Instrument

BD LSRFortessa

## Software

Data Collection - FACSDiva  
 Analysis - FlowJo v10

## Cell population abundance

Cell population abundance is shown for representative panels and gates are identical across individual datasets.

## Gating strategy

Cells were gated on using FSC and SSC. From this gate, mAb+ cells were gated on, based on the secondary Ab only stain. Gating strategy and examples are in Supplemental Fig. 1. For mAb+ gating, histograms are represented.

- Tick this box to confirm that a figure exemplifying the gating strategy is provided in the Supplementary Information.
